# Supplementary material for: Physiology, Pathology and Relatedness of Human Tissues from Gene Expression Meta-Analysis
Source: PubMed Central journal article supplement (PMC2268968; doi:10.1371/journal.pone.0001880), 2008-04-02

# Supplemental Figure 2

A

|   | Element type | Name                    | Strand | Parameters                                           | Distance to next element |
|---|--------------|-------------------------|--------|------------------------------------------------------|--------------------------|
| 1 | Matrix       | <a href="#">V\$E2FF</a> | (+)    | Min. core sim.: 0.750<br>Min. matrix sim.: optimized | 92 to 115 bp             |
| 2 | Matrix       | <a href="#">V\$NFKB</a> | (-)    | Min. core sim.: 0.750<br>Min. matrix sim.: optimized | ---                      |

B

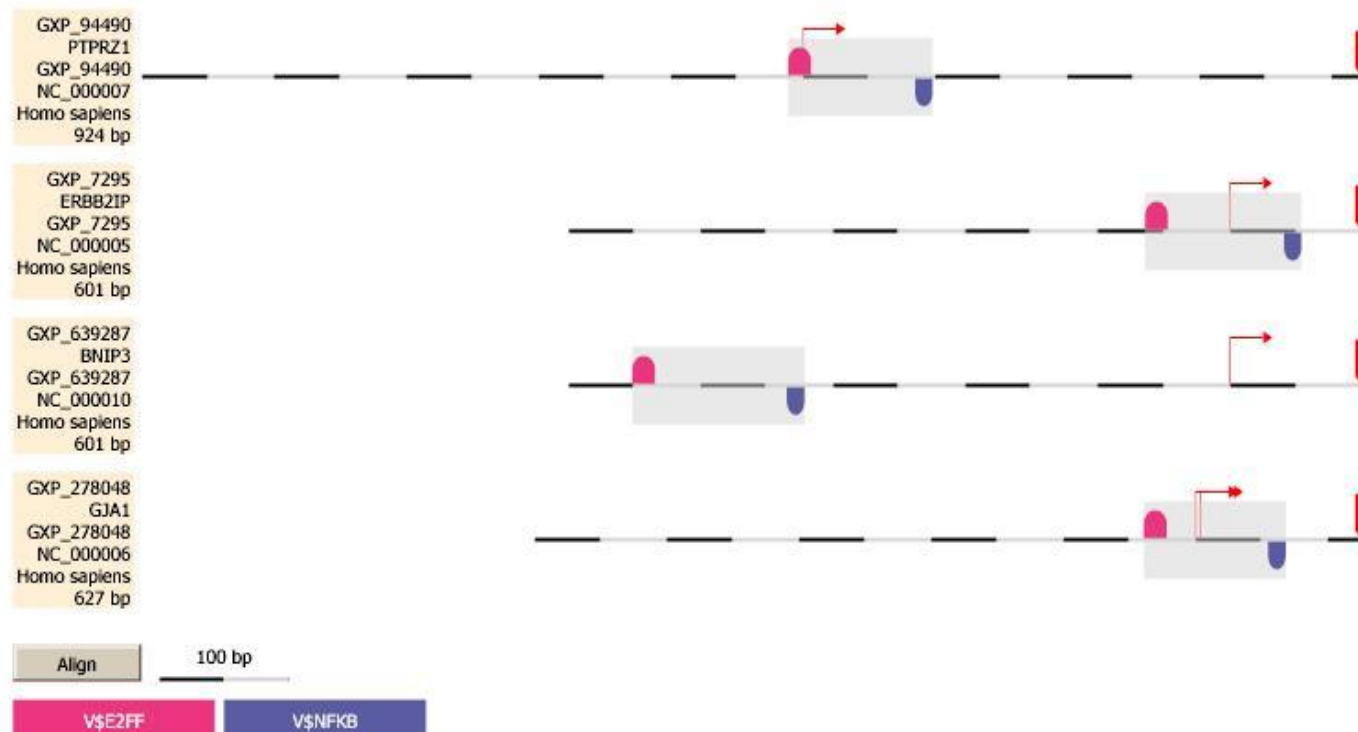

Supplement: pone.0001880.s003.pdf [file pone.0001880.s003.pdf]
