# Supplementary material for: Physiology, Pathology and Relatedness of Human Tissues from Gene Expression Meta-Analysis
Source: PubMed Central journal article supplement (PMC2268968; doi:10.1371/journal.pone.0001880), 2008-04-02
Supplement: pone.0001880.s006.pdf [file pone.0001880.s006.pdf]

D. Greco et al.  
Supplemental Material Volume 2

### Hierarchical Clustering (Figure 1 and 2)

Hierarchical clustering (HC) is a widely used method for grouping numeric entities according to their similarity. The similarity of objects can be measured in terms of statistical correlation or as a geometric distance measured in the euclidian space. The objects are visualized as leaves of a tree and their similarity is represented by their position with the respect of the root of the tree, which represents the cluster of all the objects together.

We have employed hierarchical clustering for visualizing the similarity of the 78 tissues analyzed. For this scope, we have computed the euclidian distance of all the tissue pairs. Distances are also shown as gray-scale heatmap, where the minimum distance between two tissues (identity) is represented by the color black, and the maximum distance as color white.

### Principal Component Analysis (Figure 3 and 4)

Principal component analysis (PCA) is a linear multivariate data analysis method which can be used for data dimensionality reduction and visualization. It is based on maximizing the variance of the data projection. PCA was used here for visually revealing the potential data clusters. The steps involved in PCA are to compute the eigenvalues and eigenvectors of the covariance matrix of the data. Original data vectors are then projected into the principal components, i.e., eigenvectors with largest eigenvalues. For visualization purpose, we used three principal components. In PCA, the order of the principal components has interpretation as the first component explains the most of the data variance, the second component explains the most of the remaining variance and so on.

### Curvilinear Component Analysis (Figure 5 and 6)

There are several algorithms which can be classified to the broad category of multi-dimensional scaling (MDS) methods. The projection from the original data space to the new space can be nonlinear. The general idea in these methods is to project the data from the originally high-dimensional space into the low-dimensional space so that the original pair-wise distances of data are preserved as carefully as possible in the new space. In this work we used the algorithm from Curvilinear Component Analysis. The dimensionality of the projection space was chosen to be three so that the visualization could be done conveniently. Since only distances are considered, the order of the output coordinates does not have similar meaning as in PCA.

Figure 1

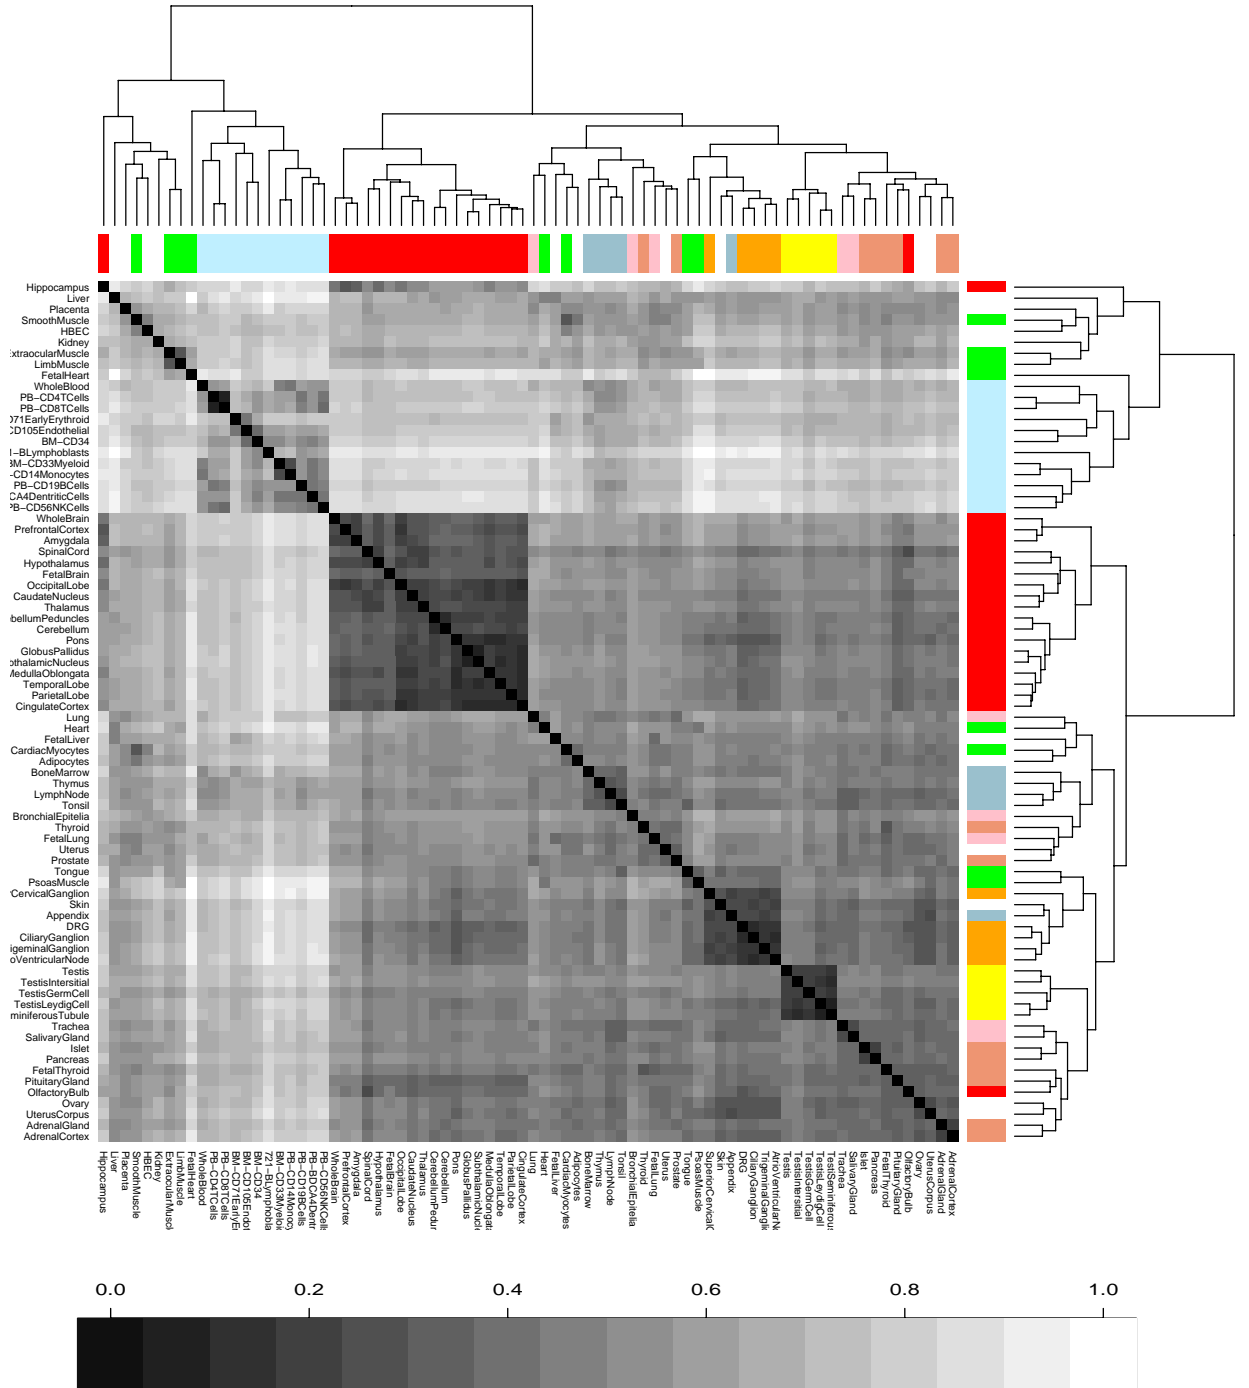

Figure 2

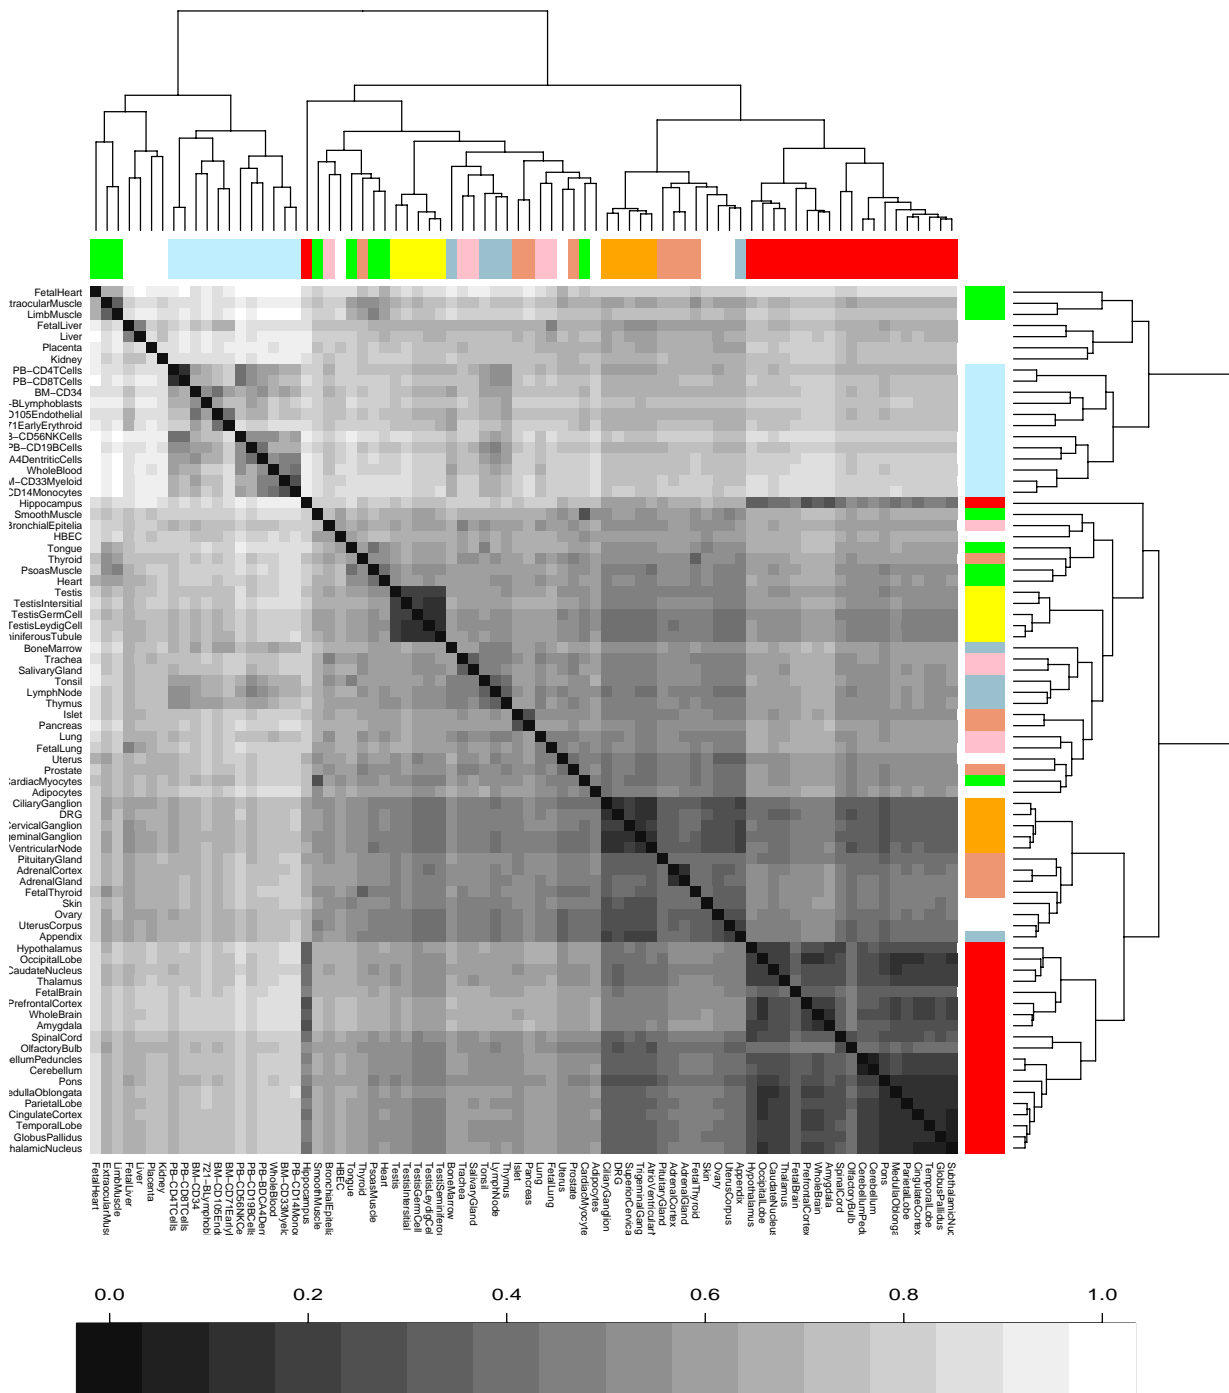

Figure 3

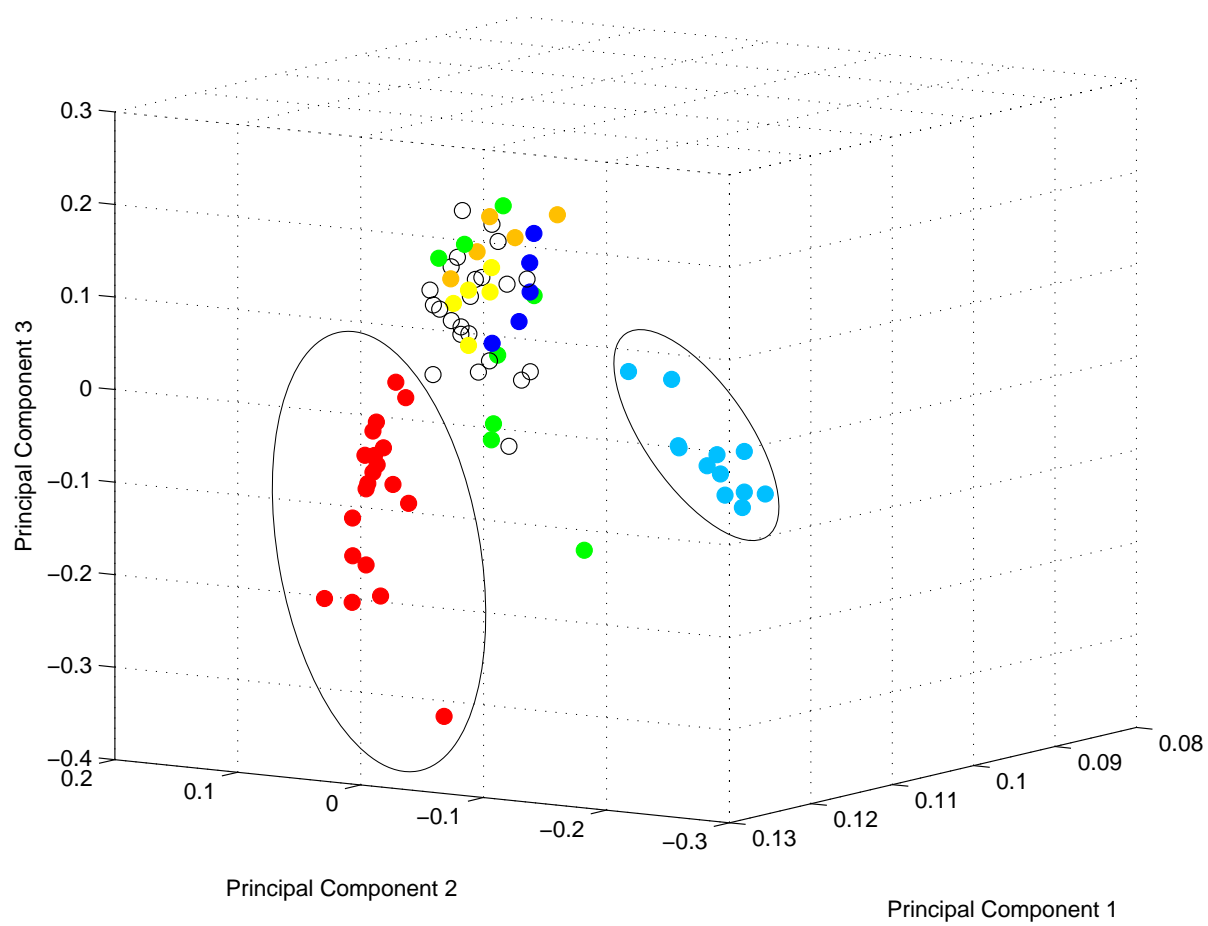

Figure 4

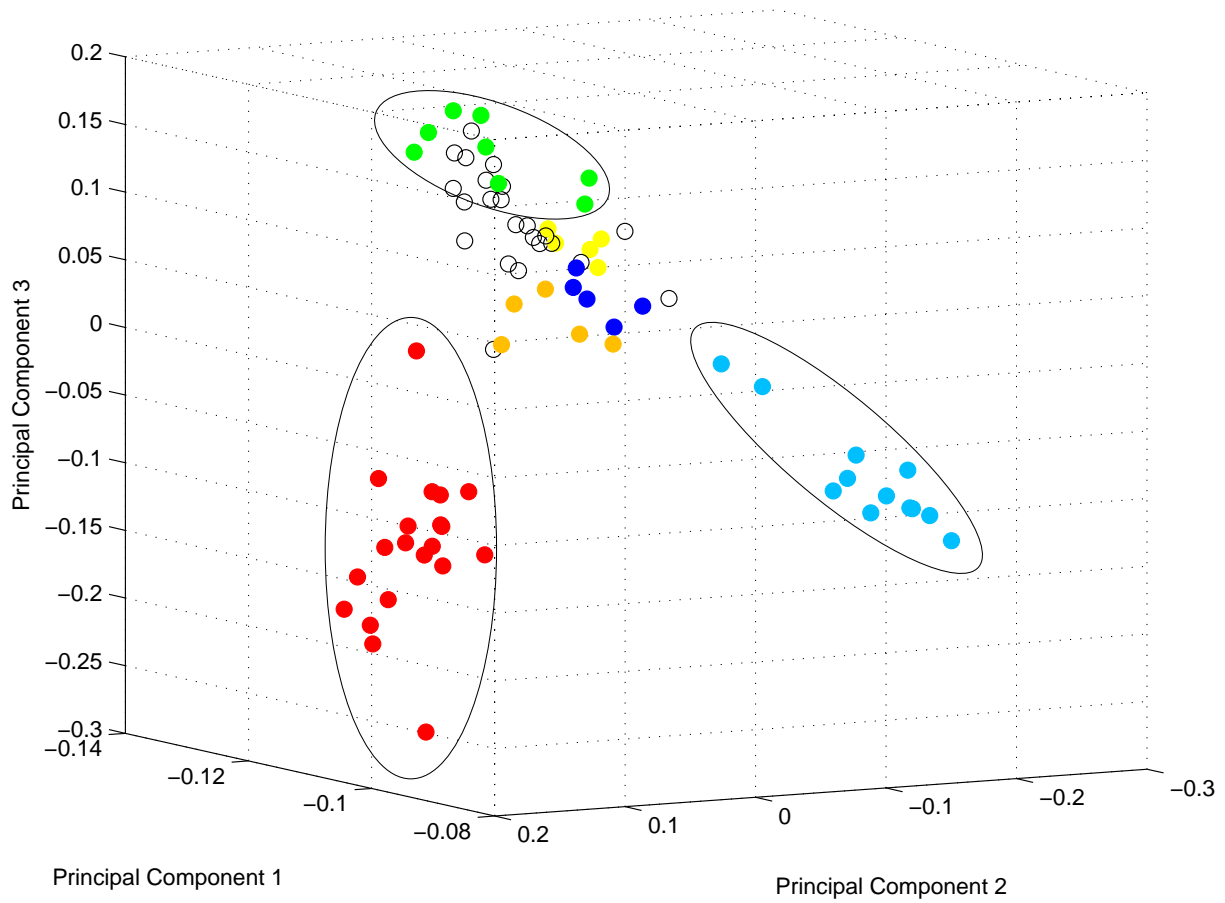

Figure 5

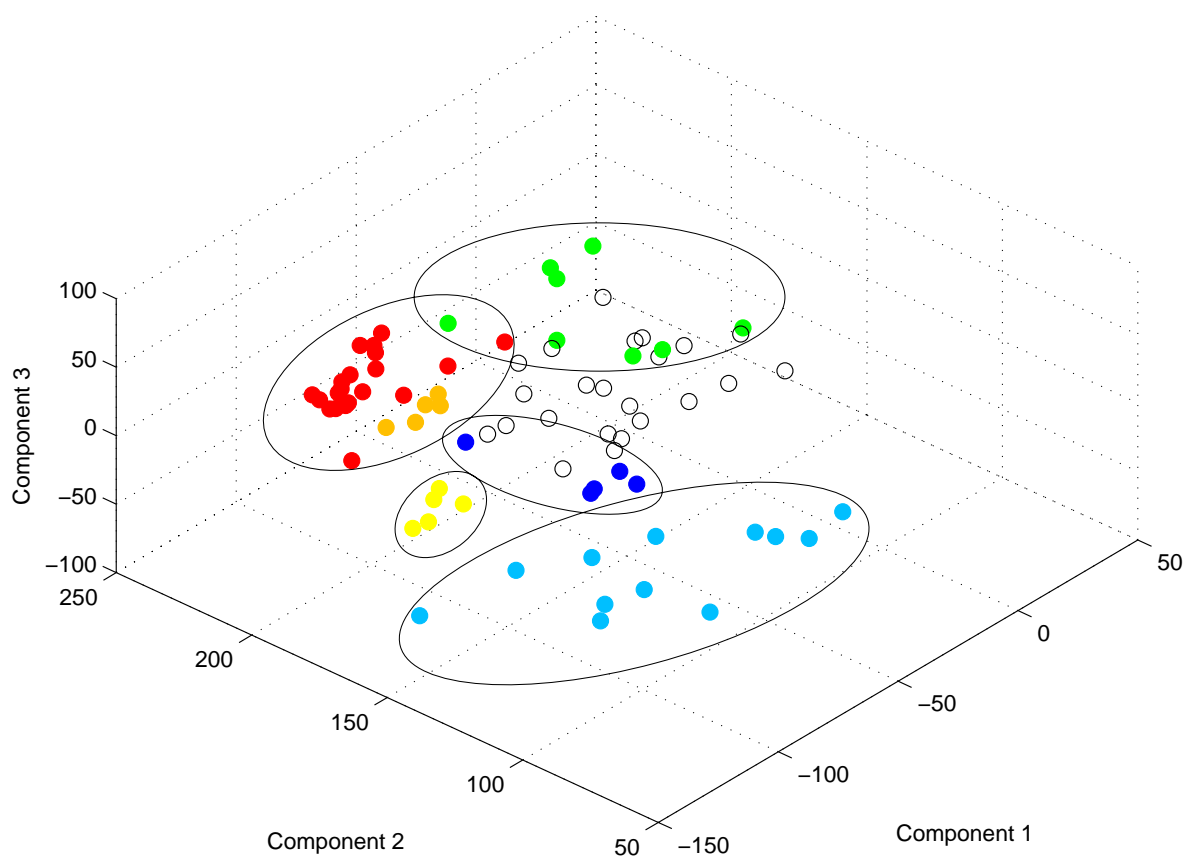

Figure 6

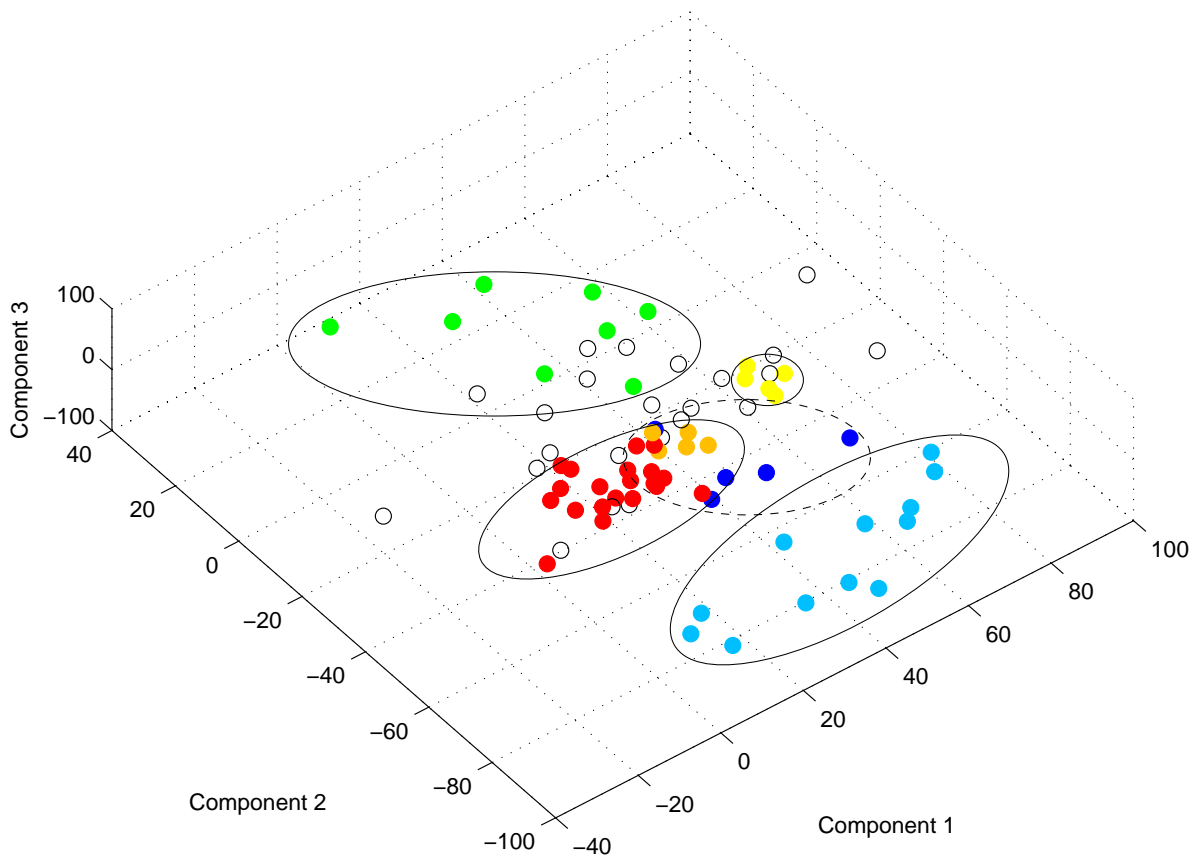

## Legends.

Figure 1 – Hierarchical clustering of tissues based on the expression of all the 12201 genes analyzed.

The color bars near by the trees indicate the tissue-color-code as in Table 1. Pair-wise Euclidian distances are shown as gray-scale heatmap between black (identity) to white. As shown by the hierarchical trees, the 78 tissues analyzed fall into two main branches. In the first one, immune cells (light blue) cluster together with liver, placenta, kidney, hippocampus, and with extraocular muscle, smooth muscle, limb muscle, and fetal heart (green). In the second main branch are placed the central nervous system (red) and peripheral nervous system tissues (orange), the glands (salmon), respiratory system tissues (pink) and muscle tissues heart, cardiac myocytes, tongue, and psoas (green). Interestingly, olfactory bulb (red) is not together with all the other central nervous system tissues, but it clusters together with pituitary gland (salmon). Similarly, appendix (dark blue) is placed under the same branch of skin and the peripheral nervous tissues (orange).

Figure 2 – Hierarchical clustering of tissues based on the expression of the 1601 tissue-selective genes.

The color bars near by the trees indicate the tissue-color-code as in Table 1. Pair-wise Euclidian distances are shown as gray-scale heatmap between black (identity) to white. As shown by the hierarchical trees, the 78 tissues analyzed fall into two main branches. In the first one, immune cells (light blue) cluster is close to a cluster consisting of fetal heart, extraocular muscle, and limb muscle (green), and a second small cluster formed by fetal liver, liver, placenta, and kidney.

In the second bigger branch, central nervous tissues (red) cluster is close to other two smaller groups of tissues, consisted respectively of: peripheral nervous tissues (orange); appendix, uterus, ovary, skin, fetal thyroid and adrenal gland. In this last branch, adrenal gland tissues (salmon) show big similarity to peripheral nervous tissues (orange). Testis tissues (yellow) cluster together in a very compact way.

Figure 3 – Principal Component Analysis of tissues based on the expression of all 12201 genes analyzed.

Each tissue is represented as a spot in the three dimensional space, based on the first three principal components. The immune cells (light blue, circled) and the central nervous tissues (red, circled) are very well separated along the first and the second principal components, respectively. A minor degree of separation is shown by muscles (green), testis (yellow), and peripheral nervous tissues (orange) along the third component.



Figure 4 – Principal Component Analysis of tissues based on the expression of the 1601 tissue-selective genes.

Each tissue is represented as a spot in the three dimensional space, based on the first three principal components.

Central nervous tissues (red, circled) and peripheral nervous tissues (orange) are well separated from all the other tissues along the first principal component. Central nervous tissues (red) show clearer distinction as they are placed farther. On the second principal component, the immune cells (light blue, circled) and, less clearly, immune organs (dark blue) segregate from all the others. Muscle tissues (green, circled) and testis tissues (yellow) are segregated along the third principal component.

Figure 5 – Curvilinear Component Analysis of tissues based on the expression of all the 12201 genes analyzed in the dataset.

Each tissue is represented as a spot in the three dimensional space.

The muscle tissues (green, circled) are segregated on the component 1, while immune cells (light blue, circled), immune tissues (dark blue, circled), testis (yellow, circled), peripheral nervous tissues (orange, circled), and central nervous tissues (red, circled) are well separated along the component 2.

Figure 6 – Curvilinear Component Analysis of tissues based on the expression of the 1601 tissue-selective genes.

Each tissue is represented as a spot in the three dimensional space.

The highlighted groups of tissues segregate clearly on the component 2, with immune cells (light blue, circled) and muscles (green, circled) to the two extremes, and central nervous tissues (red, circled) and testis (yellow, circled) in the middle. Testis (yellow) is shown distant from nervous tissues on the component 1.

Table 1

| <i>tissue</i>            | <i>tissue-color-code</i> | <i>tissue</i>           | <i>tissue-color-code</i> |
|--------------------------|--------------------------|-------------------------|--------------------------|
| Hippocampus              | red                      | Ovary                   | white                    |
| BronchialEpitelia        | pink                     | Thyroid                 | lightsalmon2             |
| LimbMuscle               | green                    | Lung                    | pink                     |
| ExtraocularMuscle        | green                    | FetalBrain              | red                      |
| Kidney                   | white                    | Liver                   | white                    |
| SubthalamicNucleus       | red                      | LymphNode               | lightblue3               |
| Skin                     | white                    | Amygdala                | red                      |
| GlobusPallidus           | red                      | Heart                   | green                    |
| CiliaryGanglion          | orange                   | Uterus                  | white                    |
| AtrioVentricularNode     | orange                   | Prostate                | lightsalmon2             |
| DRG                      | orange                   | Pancreas                | lightsalmon2             |
| Placenta                 | white                    | PrefrontalCortex        | red                      |
| 721-BLymphoblasts        | lightblue1               | CingulateCortex         | red                      |
| PB-CD8TCells             | lightblue1               | Thymus                  | lightblue3               |
| PB-CD4TCells             | lightblue1               | FetalLiver              | white                    |
| BM-CD71EarlyErythroid    | lightblue1               | Testis                  | yellow                   |
| PB-CD14Monocytes         | lightblue1               | Trachea                 | pink                     |
| PB-CD56NKCells           | lightblue1               | AdrenalGland            | lightsalmon2             |
| PB-CD19BCells            | lightblue1               | SpinalCord              | red                      |
| BM-CD33Myeloid           | lightblue1               | Cerebellum              | red                      |
| BM-CD105Endothelial      | lightblue1               | PituitaryGland          | lightsalmon2             |
| BM-CD34                  | lightblue1               | Thalamus                | red                      |
| PB-BDCA4DentriticCells   | lightblue1               | BoneMarrow              | lightblue3               |
| SuperiorCervicalGanglion | orange                   | CardiacMyocytes         | green                    |
| MedullaOblongata         | red                      | FetalThyroid            | lightsalmon2             |
| Pons                     | red                      | OlfactoryBulb           | red                      |
| Appendix                 | lightblue3               | TestisGermCell          | yellow                   |
| TrigeminalGanglion       | orange                   | TestisInterstitial      | yellow                   |
| TemporalLobe             | red                      | TestisLeydigCell        | yellow                   |
| Tongue                   | green                    | Hypothalamus            | red                      |
| UterusCorpus             | white                    | OccipitalLobe           | red                      |
| PsoasMuscle              | green                    | CerebellumPeduncles     | red                      |
| FetalLung                | pink                     | SmoothMuscle            | green                    |
| ParietalLobe             | red                      | CaudateNucleus          | red                      |
| Tonsil                   | lightblue3               | WholeBrain              | red                      |
| WholeBlood               | lightblue1               | Islet                   | lightsalmon2             |
| HBEC                     | white                    | Adipocytes              | white                    |
| SalivaryGland            | pink                     | TestiSeminiferousTubule | yellow                   |
| AdrenalCortex            | lightsalmon2             | FetalHeart              | green                    |
